# Supplementary material
Source: publisher figshare collection journal article supplement (https://acs.figshare.com/ndownloader/files/4230814)
Supplement: Supplementary file 1 [file 4230814]

**Supporting Information**  
**for**  
**Evaluating a tap water contamination incident attributed to oil contamination by**  
**non-targeted screening strategies**

Beili Wang, Yi Wan\*, Guomao Zheng, Jianying Hu

Laboratory for Earth Surface Processes, College of Urban and Environmental Sciences,  
Peking University, Beijing 100871, China

Corresponding author e-mail wany@urban.pku.edu.cn; TEL & FAX: 86-10-62759126

Number of pages: 16

Number of tables: 2

Number of figures: 7

**Supporting Information Contents**

**Chemicals and reagents**

**Sample analysis of PAH mixtures**

**Figure S1.** Validation plots obtained from 100 permutation tests by non-targeted analysis in tap water samples from the polluted period (a) and the non-pollution period (b).

**Figure S2.** S-plots of OPLS-DA based on UPLC-QTOFMS spectra of water samples from polluted and reference regions during the event.

**Figure S3.** The proposed structures of  $C_{13}H_{20}O_4 + C_{12}H_{11}NO_2S$  and  $C_{15}H_{22}O_5 + C_{12}H_{11}NO_2S$ , of which the mass spectrum are shown in Figure 3e and 3f, respectively.

**Figure S4.** MS/MS spectra of model compounds of oxy-NAs.

**Figure S5.** MS/MS spectra of model oxy-NAs derivatized with DNS.

**Figure S6.** The score plots of OPLS-DA model by targeted analysis of NA mixtures in tap water samples from the polluted period (a) and the non-pollution period (b).

**Figure S7.** Validation plots obtained from 100 permutation tests by targeted analysis in tap water samples from the polluted period (a) and the non-pollution period (b).

**Table S1.** Name, structure and retention time of model NA compounds in UPLC-QTOF-MS analysis.

**Table S2.** Concentrations of detected PAHs and alkyl-PAHs in the tap water samples (ng/L) collected during the Lanzhou the “4.11” tap water pollution event and the non-pollution period.

## **Reference**

## Chemicals and reagents.

Fourteen naphthenic acids (NAs) and three oxidized NAs (oxy-NAs) were used as model compounds for analysis of NA mixtures: 4-n-propylcyclohexanecarboxylic acid (*cis*- and *trans*-) ( $C_{10}H_{18}O_2$ ), *trans*-4-pentylcyclohexane carboxylic acid ( $C_{12}H_{22}O_2$ ), 12-oxochenodeoxycholic acid ( $C_{24}H_{38}O_5$ ), cyclohexanecarboxylic acid ( $C_7H_{12}O_2$ ), 1-pyrenebutyric acid ( $C_{20}H_{16}O_2$ ), abietic acid ( $C_{20}H_{30}O_2$ ), 1-adamantaneacetic acid ( $C_{12}H_{18}O_2$ ), 2-hexyldecanoic acid ( $C_{16}H_{32}O_2$ ) and 12-hydroxysteric acid ( $C_{18}H_{36}O_3$ ) were purchased from TCI (Tokyo Chemical Industry Co., Tokyo, Japan); 1,2,3,4-tetrahydro-2-naphthoic acid ( $C_{11}H_{12}O_2$ ), dicyclohexylacetic acid ( $C_{14}H_{24}O_2$ ), 5-beta-cholanic acid ( $C_{24}H_{40}O_2$ ), cyclohexane pentanoic acid ( $C_{11}H_{20}O_2$ ) and 12-hydroxydodecanoic acid ( $C_{12}H_{24}O_3$ ) were purchased from Sigma Aldrich (Oakville, ON, Canada); 1-methyl-1-cyclohexane carboxylic acid ( $C_8H_{14}O_2$ ) was purchased from Alfa Aesar (Ward Hill, MA); *trans*-4-tert-butylcyclohexanecarboxylic acid ( $C_{11}H_{20}O_2$ ) was purchased from Acros Organics (Morris Plains, NJ); 1-adamantane carboxylic acid ( $C_{11}H_{16}O_2$ ) was purchased from J&K Chemical (Beijing, China). The commercial mixture of NAs and redistilled 2-pentene were from Acros Organics. Eleven polycyclic aromatic hydrocarbons (PAHs) standard including phenanthrene, fluoranthene, pyrene, chrysene, benzo[a]anthracene, benzo[b]fluoranthene, benzo[k]fluoranthene, benzo[a]pyrene, indene benzene pyrene, benzo[ghi]perylene and dibenz[a,h]anthracene were purchased from Organic Standards Solutions International Smart Solution. Two surrogate standards of d-phenanthrene, d-chrysene, and four alkylated PAHs standards of 3-methylphenanthrene, 9-methylphenanthrene, methylpyrene, 4-methyldibenzothiophene were from Anpel

Laboratory Technologies (China). Methanol, ethyl acetate (EA), phenixin ( $\text{CCl}_4$ ) n-hexane and dichloromethane (DCM) were obtained from Fisher Chemicals (Fair Lawn, NJ). HPLC grade ammonium acetate and formic acid were purchased from Dima Technology TNC (USA). Hydrochloric acid, bromine and ammonia were purchased from Beijing chemicals. Distilled water was prepared by a Milli-Q Synthesis water purification system (Millipore, Bedford, MA, USA).

#### **Sample analysis of PAHs and alkyl-PAHs.**

500 mL of water spiked with 25 ng of surrogate standards was extracted through an Oasis MAX cartridge. The sorbent of MAX cartridge is synthesized from the reversed-phase Oasis HLB copolymer and features two retention mechanisms: anion exchange and reversed phase. This makes the cartridge suitable for simultaneous extractions of PAHs and other charged compounds in water samples. 6 mL of methanol, 12 mL of ethyl acetate and 6 mL of n-hexane/DCM (2:1, v/v) were used to elute the analytes. The elutes were mixed, dried and redissolved in 0.1 mL of hexane and the injection volume was 1  $\mu\text{L}$  for analyses by a GC-EI-MS detector (Shimadzu QP 2010 plus). The methods for GC/MS analyses has been reported previously.<sup>1</sup> Chromatographic separation was achieved on a HB-5MS capillary column (30 m  $\times$  0.32 mm  $\times$  0.25  $\mu\text{m}$  film thickness). The carrier gas was helium at a constant flow rate of 1.0 mL/min. A splitless injector was used and held at 290  $^{\circ}\text{C}$ . The temperature program was from 50  $^{\circ}\text{C}$  (2 min) to 300  $^{\circ}\text{C}$  (20 min) at the rate of 5  $^{\circ}\text{C}/\text{min}$ . The interface and ion temperatures were maintained at 150 and 230  $^{\circ}\text{C}$ , respectively. The method detection limits (MDL) for individual PAHs and alkylated PAHs isomers were determined to be 0.04-1.9 ng/L in water samples. The efficiencies of the sample preparation procedure was

assessed by analyzing water samples spiked with standard solutions of PAHs and alkyl-PAHs. Recoveries of PAHs and alkylated PAHs in triplicate spiked samples were 58-72% and 73-87%, respectively.

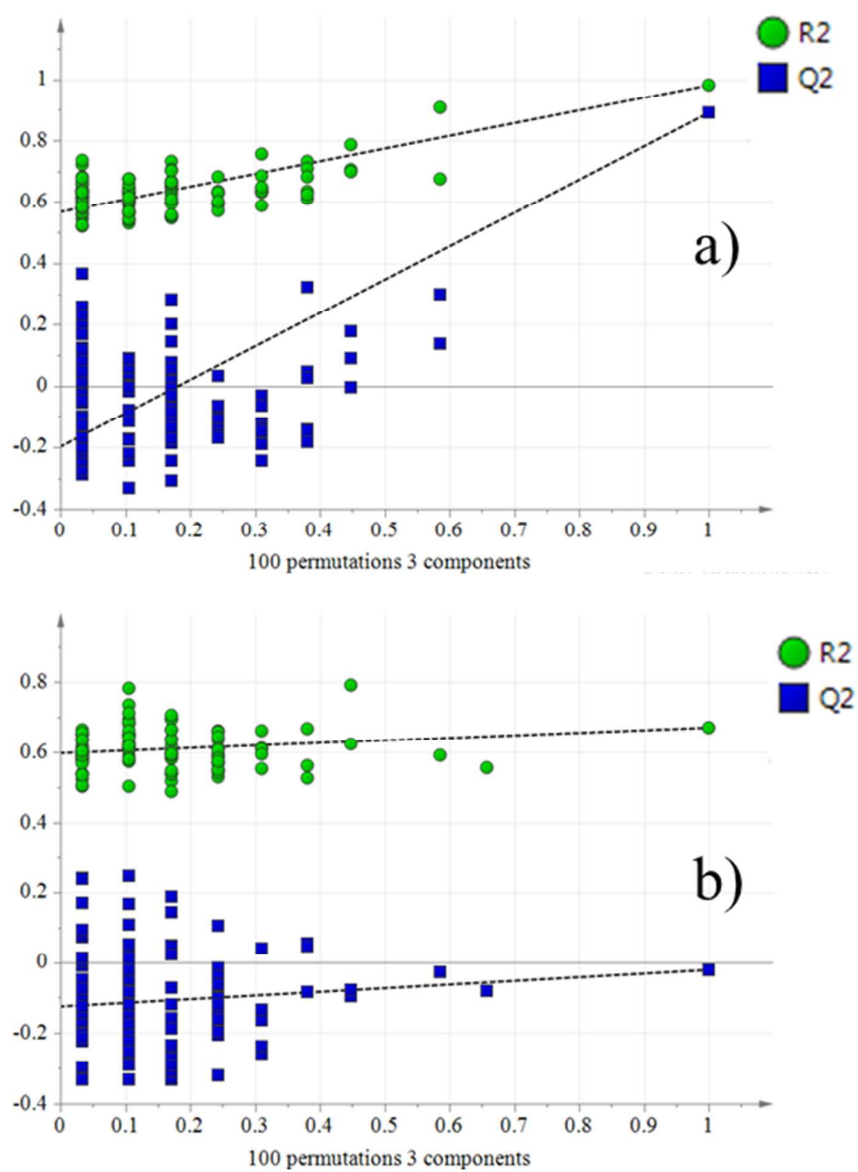

Figure S1. Validation plots obtained from 100 permutation tests by non-targeted analysis in tap water samples from the polluted period (a) and the non-pollution period (b).

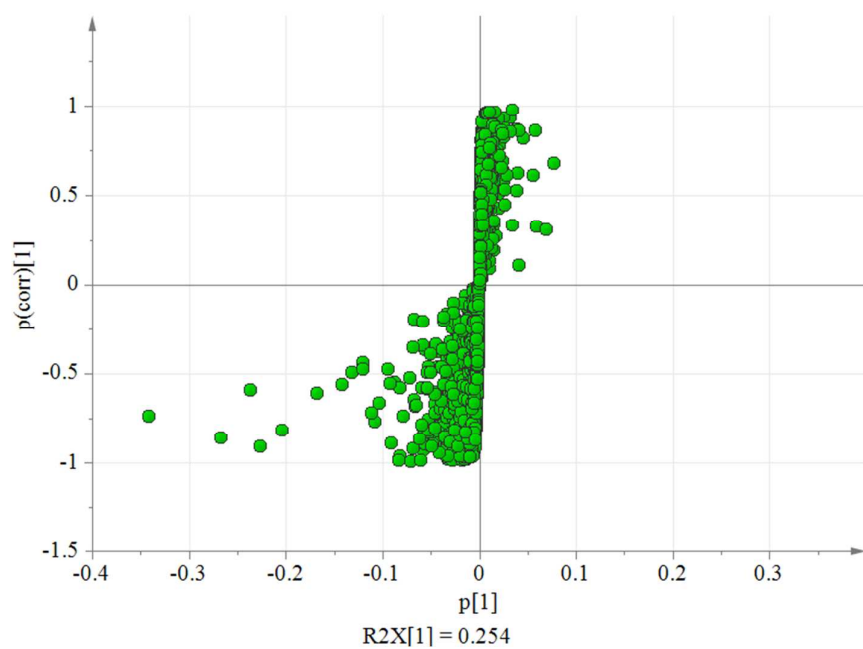

Figure S2. S-plots of OPLS-DA based on UPLC-QTOFMS spectra of water samples from polluted and reference regions during the event.

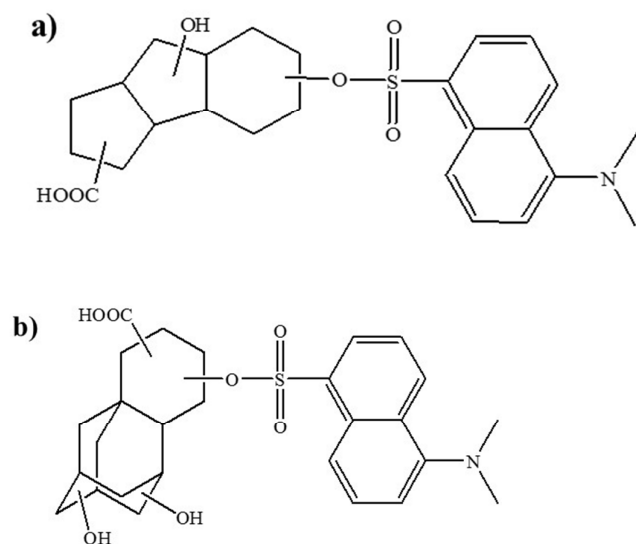

Figure S3. The proposed structures of  $C_{13}H_{20}O_4 + C_{12}H_{11}NO_2S$  a) and  $C_{15}H_{22}O_5 + C_{12}H_{11}NO_2S$  b), of which the mass spectrum are shown in Figure 3e and 3f, respectively.



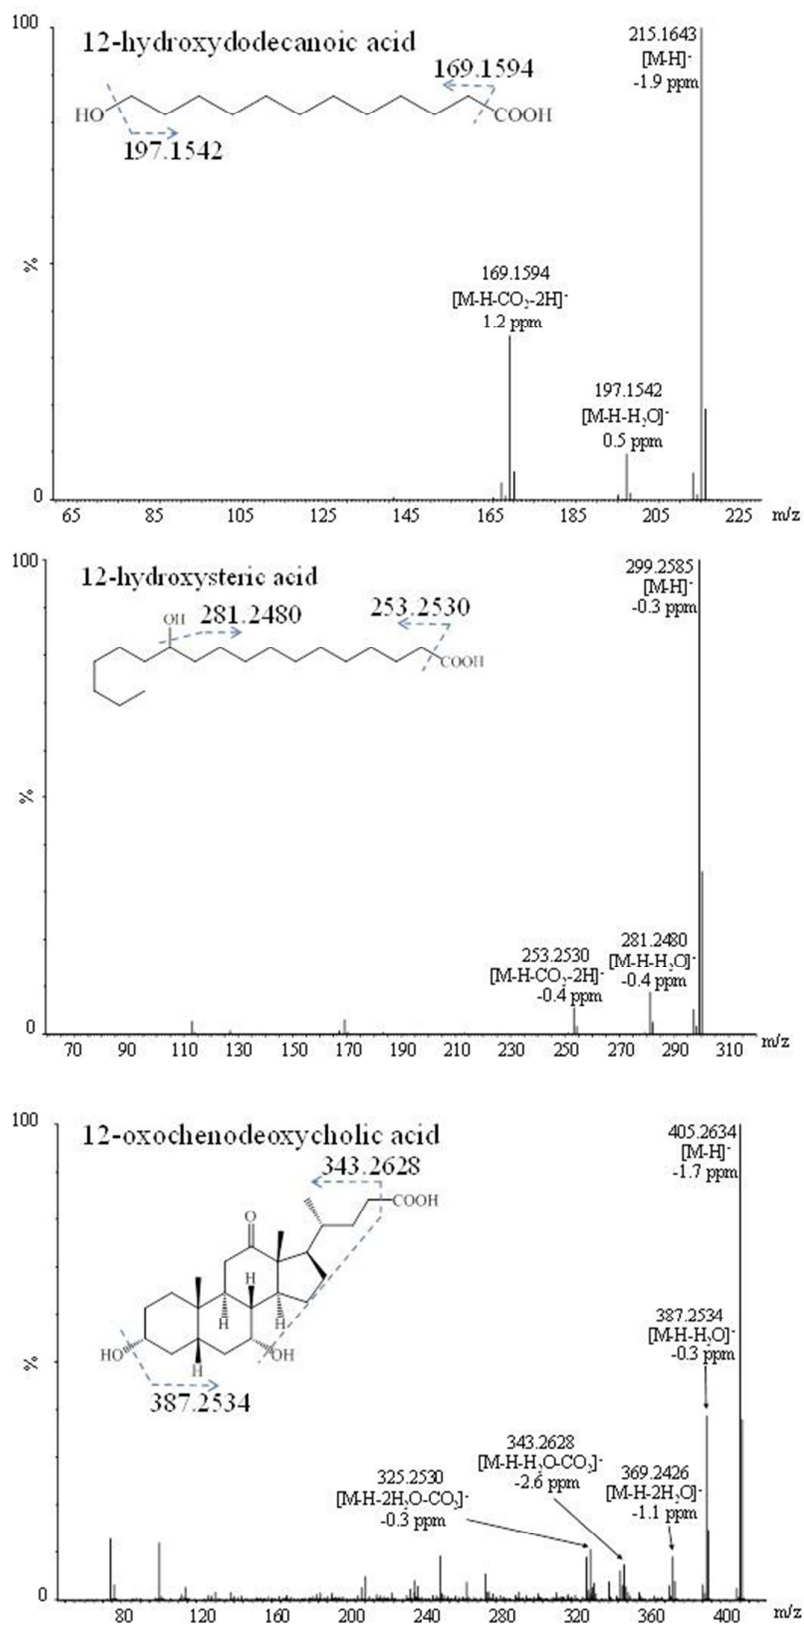

Figure S4. MS/MS spectra of model compounds of oxy-NAs.

## 12-hydroxydodecanoic acid derivatives

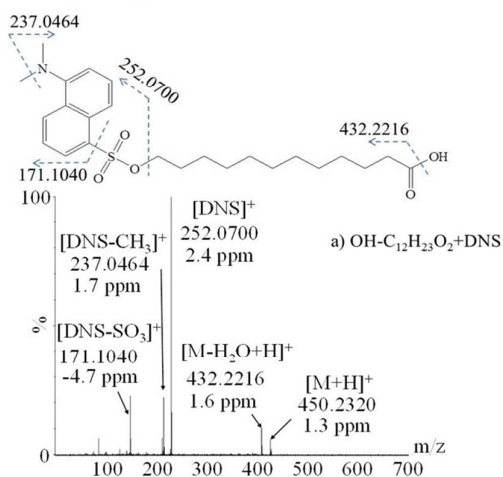

## 12-hydroxyteric acid derivatives

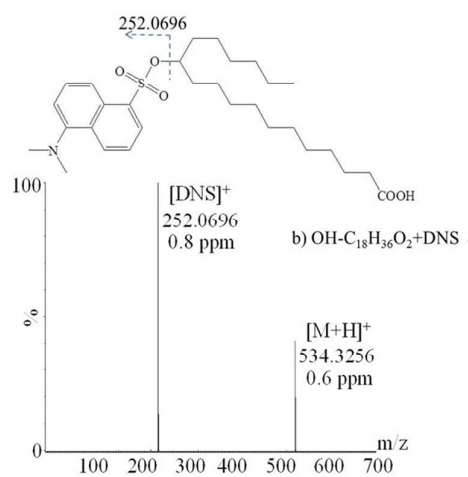

## 12-oxochenodeoxycholic acid derivatives

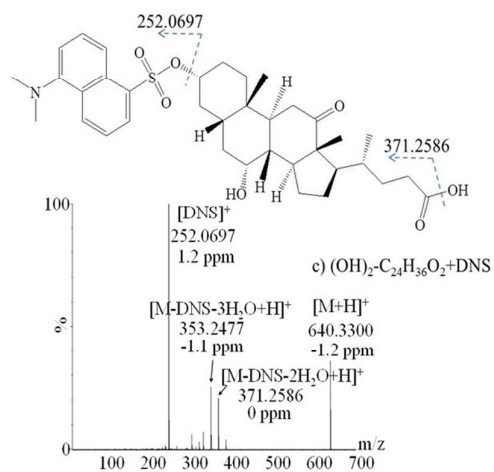

Figure S5. MS/MS spectra of model oxy-NAs derivatized with DNS.

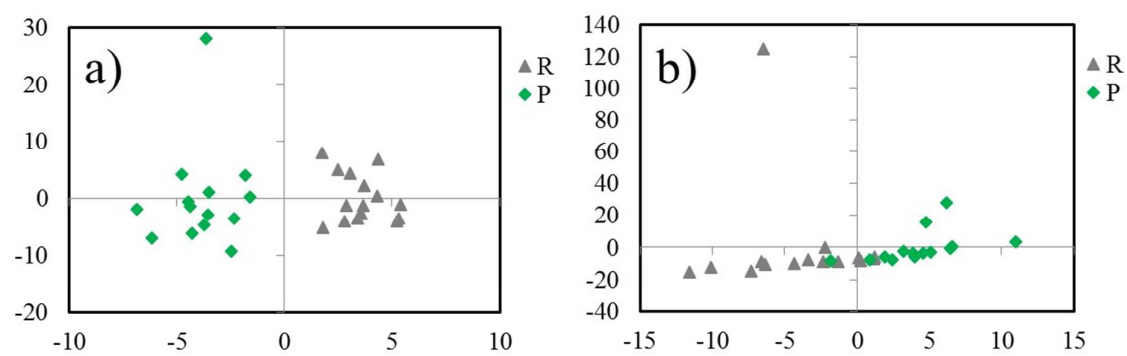

Figure S6. The score plots of OPLS-DA model by targeted analysis of NA mixtures in tap water samples from the polluted period (a) and the non-pollution period (b).

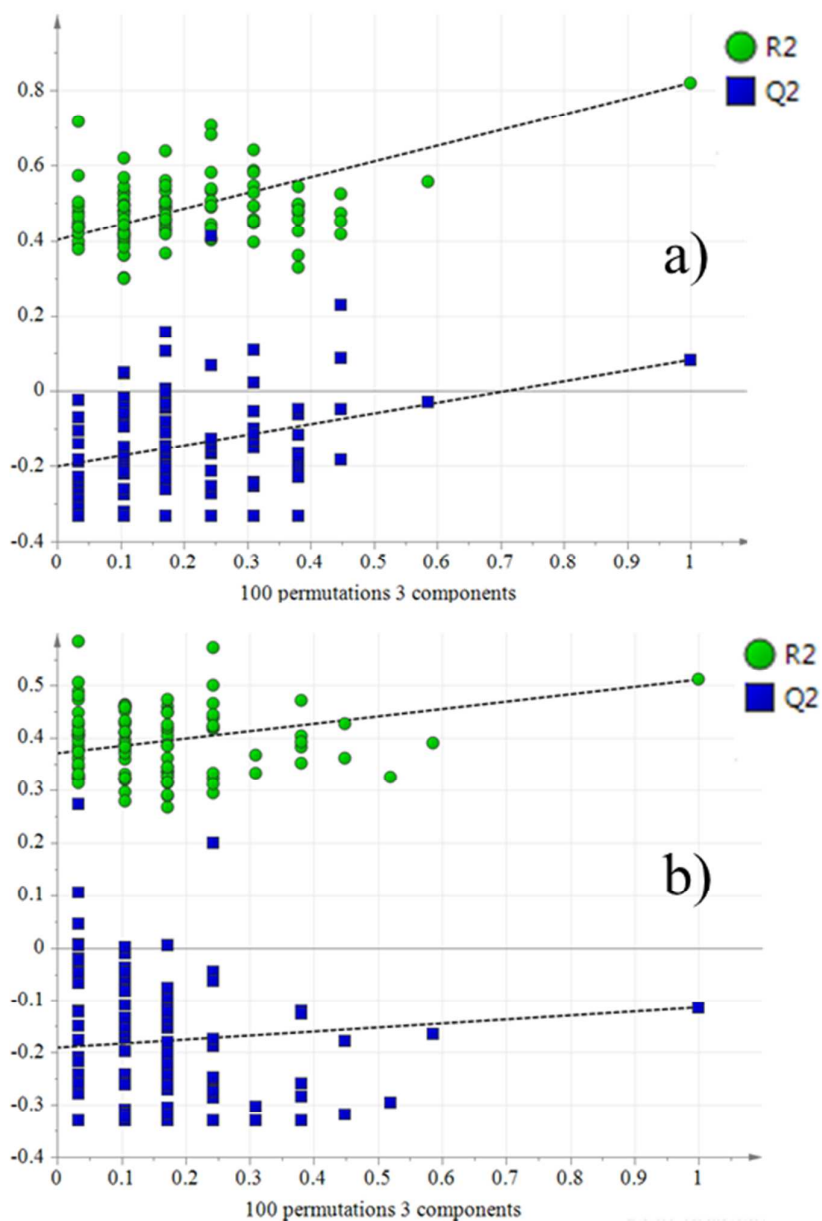

Figure S7. Validation plots obtained from 100 permutation tests by targeted analysis in tap water samples from the polluted period (a) and the non-pollution period (b).

Table S1. Name, structure and retention time of model NA compounds in UPLC-QTOF-MS analysis.

| Name                                                                                          | CAS No.    | Molecular Weight                                                      | RT (min)      | Structure                                                                             |
|-----------------------------------------------------------------------------------------------|------------|-----------------------------------------------------------------------|---------------|---------------------------------------------------------------------------------------|
| 12-hydroxysteric acid                                                                         | 106-14-9   | $C_{12}H_{24}O_3$ ,<br>MW= 300.2664                                   | 9.32          | 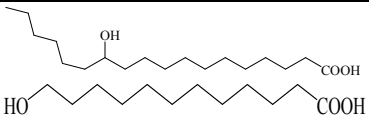   |
| 12-hydroxydodecanoic acid                                                                     | 505-95-3   | $C_{18}H_{36}O_3$ ,<br>MW= 216.1725                                   | 4.87          |    |
| 12-oxochenodeoxycholic acid                                                                   | 2458-08-4  | $C_{24}H_{38}O_5$ ,<br>MW= 406.2719                                   | 4.44          |    |
| 2-hexyldecanoic acid                                                                          | 25354-97-6 | $C_{16}H_{32}O_2$ ,<br>MW= 256.2402                                   | 11.05         |    |
| cyclohexanecarboxylic acid                                                                    | 98-89-5    | $C_7H_{12}O_2$ ,<br>MW= 128.0837                                      | 3.31          |   |
| 1-Methyl-1-cyclohexanecarboxylic acid                                                         | 1123-25-7  | $C_8H_{14}O_2$ ,<br>MW= 142.0994                                      | 4.18          |  |
| <i>trans</i> -4-tert-butylcyclohexanecarboxylic acid( <i>cis</i> - and <i>trans</i> -mixture) | 943-29-3   | $C_{10}H_{18}O_2$ ( <i>cis</i> - and <i>trans</i> -),<br>MW= 170.1307 | 5.05;<br>5.23 |  |
| <i>trans</i> -4-tert-butylcyclohexanecarboxylic acid                                          | 5962-88-9  | $C_{11}H_{20}O_2$ -butyl,<br>MW= 184.1463                             | 5.34          |  |
| cyclohexane pentanoic acid                                                                    | 943-29-3   | $C_{11}H_{20}O_2$ ,<br>MW= 184.1463                                   | 5.84          |  |

|                                                   |            |                                                                  |       |                                                                                       |
|---------------------------------------------------|------------|------------------------------------------------------------------|-------|---------------------------------------------------------------------------------------|
| <i>trans</i> -4-pentylcyclohexane carboxylic acid | 38289-29-1 | C <sub>12</sub> H <sub>22</sub> O <sub>2</sub> ,<br>MW= 198.1620 | 7.00  | 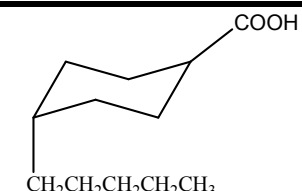   |
| 1,2,3,4-tetrahydro-2-naphthoic acid               | 53440-12-3 | C <sub>11</sub> H <sub>12</sub> O <sub>2</sub> ,<br>MW= 176.0837 | 3.97  |    |
| 2,2-dicyclohexylacetic acid                       | 52034-92-1 | C <sub>14</sub> H <sub>24</sub> O <sub>2</sub> ,<br>MW= 224.1776 | 7.88  |    |
| 1-pyrenebutyric acid                              | 3443-45-6  | C <sub>20</sub> H <sub>16</sub> O <sub>2</sub> ,<br>MW= 288.1150 | 6.25  |    |
| abietic acid                                      | 514-10-3   | C <sub>20</sub> H <sub>30</sub> O <sub>2</sub> ,<br>MW= 302.2246 | 10.98 |   |
| 5-beta-cholanic acid                              | 546-18-9   | C <sub>24</sub> H <sub>40</sub> O <sub>2</sub> ,<br>MW= 360.3028 | 12.95 |  |
| 1-adamantane carboxylic acid                      | 828-51-3   | C <sub>11</sub> H <sub>16</sub> O <sub>2</sub> ,<br>MW= 180.1150 | 4.70  |  |
| 1-adamantaneacetic acid                           | 4942-47-6  | C <sub>12</sub> H <sub>18</sub> O <sub>2</sub> ,<br>MW= 194.1307 | 4.98  |  |

Table S2. Concentrations of detected PAHs and alkyl-PAHs in the tap water samples (ng/L) collected during the Lanzhou the “4.11” tap water pollution event and the non-pollution period.

|                          | Pollution period |           |             |            |           | Non-pollution period |           |           |           |            |
|--------------------------|------------------|-----------|-------------|------------|-----------|----------------------|-----------|-----------|-----------|------------|
|                          | HG               | CG        | QLH         | AN         | XG        | HG                   | CG        | QLH       | AN        | XG         |
| phenanthrene             | ND               | ND        | ND          | ND         | ND        | ND                   | ND        | ND        | ND        | ND         |
| fluoranthene             | 5.5 ± 2.2        | 6 ± 1     | 10.5 ± 11.6 | 10.2 ± 9.5 | 4.3 ± 3.9 | 1.6 ± 1.3            | 2 ± 0.7   | 2.9 ± 1.6 | 1.4 ± 0.6 | 3.7 ± 2.5  |
| pyrene                   | 2.7 ± 1.1        | 2.3 ± 0.6 | 5.4 ± 5.9   | 4.9 ± 5.2  | 2.6 ± 3.8 | ND                   | ND        | ND        | ND        | ND         |
| chrysene                 | 0.2 ± 0.1        | 0.4 ± 0.3 | 0.5 ± 0.8   | 0.4 ± 0.6  | 0.4 ± 0.7 | 0.1 ± 0.2            | 0.2 ± 0.3 | 0.1 ± 0.2 | 0.1 ± 0.2 | 3.2 ± 9.1  |
| benzo[a]anthracene       | 2.3 ± 0.8        | 2.4 ± 2.3 | 1.6 ± 0.9   | 1.7 ± 1.2  | 1.4 ± 2.4 | 0.6 ± 0.3            | 0.8 ± 0.4 | 0.9 ± 0.6 | 0.9 ± 1.4 | 5.6 ± 14.4 |
| benzo[b]fluoranthene     | 0.5 ± 0.3        | 0.6 ± 0.3 | 0.4 ± 0.2   | 0.3 ± 0.3  | 0.2 ± 0.2 | 0.3 ± 0.3            | 0.5 ± 0.5 | 0.2 ± 0.2 | 0.2 ± 0.2 | 1.9 ± 5.2  |
| benzo[k]fluoranthene     | 0.3 ± 0.1        | 0.2 ± 0.1 | 0.2 ± 0.1   | 0.2 ± 0.2  | 0.1 ± 0.1 | 0.1 ± 0.1            | 0.2 ± 0.3 | 0.1 ± 0.1 | 0.1 ± 0.1 | 1 ± 2.3    |
| benzo[a]pyrene           | ND               | ND        | ND          | ND         | ND        | ND                   | ND        | ND        | ND        | ND         |
| indene benzene pyrene    | ND               | ND        | ND          | ND         | ND        | ND                   | ND        | ND        | ND        | ND         |
| benzo[ghi]perylene       | ND               | ND        | ND          | ND         | ND        | ND                   | ND        | ND        | ND        | ND         |
| dibenz[a,h]anthracene    | ND               | ND        | ND          | ND         | ND        | ND                   | ND        | ND        | ND        | ND         |
| 3-methylphenanthrene     | 1.8 ± 0.3        | 1.5 ± 0.5 | 1.7 ± 0.8   | 1.8 ± 1.2  | ND        | ND                   | ND        | ND        | ND        | ND         |
| 9-methylphenanthrene     | 1.9 ± 0.7        | 1.4 ± 1.2 | 1.7 ± 1.3   | 1.3 ± 1.2  | 1 ± 1     | ND                   | ND        | ND        | ND        | ND         |
| methylpyrene             | 0.2 ± 0.1        | 0.3 ± 0.2 | 0.4 ± 0.4   | 0.2 ± 0.1  | 0.3 ± 0.4 | 0.1 ± 0.1            | 0.1 ± 0.1 | 0.1 ± 0.1 | 0.1 ± 0.2 | 0.3 ± 0.4  |
| 4-methyldibenzothiophene | ND               | ND        | ND          | ND         | ND        | ND                   | ND        | ND        | ND        | ND         |
| 2-methylindene           | ND               | ND        | ND          | ND         | ND        | ND                   | ND        | ND        | ND        | ND         |
| 1-methylphenanthrene     | 2.2 ± 0.5        | 1.8 ± 0.8 | 1.9 ± 0.8   | 1.9 ± 1.4  | ND        | ND                   | ND        | ND        | ND        | ND         |
| 2-methylphenanthrene     | ND               | 2.7 ± 1.5 | 3.4 ± 1.5   | 2.9 ± 1.7  | ND        | ND                   | ND        | ND        | ND        | ND         |
| 4-methylphenanthrene     | 0.8 ± 0.2        | 0.8 ± 0.6 | 1 ± 0.8     | 0.8 ± 0.7  | 0.4 ± 0.4 | ND                   | ND        | ND        | ND        | ND         |

ND: not detected.

## Reference

1. Zhao, Y.; Hong, B.; Fan, Y. Q.; Wen, M.; Han, X. Accurate analysis of polycyclic aromatic hydrocarbons (PAHs) and alkylated PAHs homologs in crude oil for improving the gas chromatography/mass spectrometry performance. *Ecotox. Environ. Safe*, **2014**, *100*, 242-250.
